# Supplementary material
Source: PubMed Central journal article supplement (PMC6113466)
Supplement: zjm999096091s1.pdf [file zjm999096091s1.pdf]

## Suppl. Fig. 1

Prevalence and genomic structure of bacteriophage *phi3* in human derived livestock-associated MRSA from 2000 to 2015  
van Alen et al.

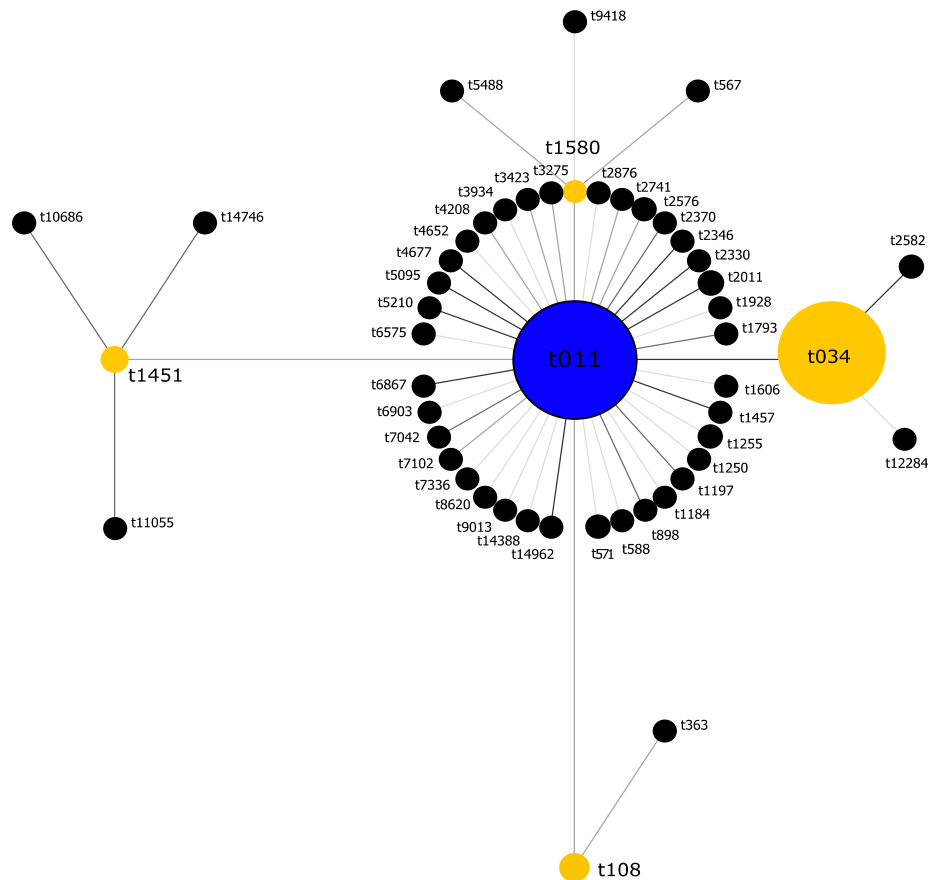

### BURP cluster of *spa*-clonal complex t011

BURP clustering of MRSA isolates recovered at the UKM resulted in the *spa*-clonal complex (CC) 011, which comprises CC398 isolates. Each dot represents a unique *spa* type and the *spa* type t011 represents the group founder with the highest founder score. BURP clustering was performed using Ridom StaphType (Ridom© GmbH, Münster, Germany).
