# Supplementary material
Source: PubMed Central journal article supplement (PMC6113466)
Supplement: zjm999096091s2.pdf [file zjm999096091s2.pdf]

**Prevalence and genomic structure of bacteriophage *phi3* in human derived livestock-associated MRSA from 2000 to 2015**

van Alen et al.

Table S1: Oligonucleotide primers used for PCR amplification

| Oligonucleotide  | Sequence (5'-3')           | Reference  |
|------------------|----------------------------|------------|
| <i>hlb-1-for</i> | CGGCGTAGCGATTGTAAG         | This study |
| <i>hlb-2-rev</i> | GGGAACGCATATACATCCC        | This study |
| <i>hlb-3-for</i> | GCTGCAACACTTGCATTAGC       | This study |
| <i>hlb-4-rev</i> | GGATACAAAACGGTCGATAACA     | This study |
| <i>chp-for</i>   | TTTACTTTTGAACCGTTTCCTAC    | This study |
| <i>chp-rev</i>   | TATTCATTAGTTTTTCCAGGACCATT | This study |
| <i>sak-for</i>   | AAGGCGATGACGCGAGTTAT       | This study |
| <i>sak-rev</i>   | GCGCTTGGATCTAATTCAAC       | This study |
| <i>scn-for.2</i> | CTAGATAAAAATGAGGCACAAG     | This study |
| <i>scn-rev.2</i> | CTTTTTAGTGCTTCGTCAATTTC    | This study |
| <i>sea-for</i>   | AGATCATTCGTGGTATAACG       | This study |
| <i>sea-rev</i>   | TTAACCGAAGGTTCTGTAGA       | This study |
| <i>sep-for</i>   | AATCATAACCAACCGAATCA       | This study |
| <i>sep-rev</i>   | TCATAATGGAAGTGCTATAA       | This study |

Table S2: Accession numbers of the *phi3*-positive isolates

| Isolate   | Isolation year | Accession number                         |
|-----------|----------------|------------------------------------------|
| 1_1439    | 2006           | LT992456; LT992457                       |
| 2_LA_86   | 2008           | LT992463                                 |
| 3_LA_115  | 2008           | LT992464                                 |
| 4_LA_208  | 2010           | LT992466                                 |
| 5_3949    | 2010           | LT992462                                 |
| 6_LA_232  | 2010           | LT992465                                 |
| 7_4623    | 2010           | LT992458                                 |
| 8_LA_272  | 2011           | LT992461                                 |
| 9_LA_281  | 2011           | LT992460                                 |
| 10_5235   | 2011           | LT992472                                 |
| 11_LA_290 | 2011           | OVTT01000001; OVTT01000002; OVTT01000003 |
| 12_LA_293 | 2011           | LT992468                                 |
| 13_LA_301 | 2011           | LT992470                                 |
| 14_5418   | 2011           | LT992473                                 |
| 15_LA_305 | 2012           | LT992469                                 |
| 16_LA_309 | 2012           | LT992467                                 |
| 17_LA_343 | 2012           | LT992471                                 |
| 19_LA_388 | 2013           | LT992474                                 |
| 20_LA_415 | 2013           | LZ992475                                 |
| 21_LA_436 | 2014           | LT992476                                 |
| 22_LA_562 | 2015           | LT992477                                 |

Table S3: Resistance profile of *phi3*-positive MRSA *spa*-CC011

| Gene          | Description <sup>a</sup>                                             | 14<br>39 | LA<br>86 | LA<br>115 | LA<br>208 | 39<br>49 | LA<br>232 | 46<br>23 | LA<br>272 | LA<br>281 | 52<br>35 | LA<br>290 | LA<br>293 | LA<br>301 | 54<br>18 | LA<br>305 | LA<br>309 | LA<br>343 | LA<br>388 | LA<br>415 | LA<br>436 | LA<br>562 |
|---------------|----------------------------------------------------------------------|----------|----------|-----------|-----------|----------|-----------|----------|-----------|-----------|----------|-----------|-----------|-----------|----------|-----------|-----------|-----------|-----------|-----------|-----------|-----------|
| <i>mecA</i>   | Alternate penicillin binding protein 2, defining MRSA                | +        | +        | +         | +         | +        | +         | +        | +         | +         | +        | +         | +         | +         | +        | +         | +         | +         | +         | +         | +         | +         |
| <i>blaZ</i>   | Beta-lactamase gene                                                  | +        | +        | +         | +         | +        | +         | +        | +         | +         | +        | +         | +         | +         | +        | -         | +         | +         | +         | +         | +         | +         |
| <i>blaI</i>   | Beta lactamase repressor (inhibitor)                                 | +        | +        | +         | +         | +        | +         | +        | +         | +         | +        | +         | +         | +         | +        | -         | +         | +         | +         | +         | +         | +         |
| <i>blaR</i>   | Beta-lactamase regulatory protein                                    | +        | +        | +         | +         | +        | +         | +        | +         | +         | +        | +         | +         | +         | +        | -         | +         | +         | +         | +         | +         | +         |
| <i>tet(K)</i> | Tetracycline efflux protein                                          | -        | a        | a         | -         | +        | -         | +        | +         | +         | +        | +         | -         | a         | +        | +         | a         | -         | +         | +         | +         | -         |
| <i>tet(M)</i> | Ribosomal protection protein associated with tetracycline resistance | +        | +        | +         | +         | +        | +         | +        | +         | +         | +        | +         | +         | +         | +        | +         | +         | +         | +         | +         | +         | +         |

<sup>a</sup> Description as provided by the manufacturer (*S. aureus* Genotyping Kit 2.0 manual, Alere Technologies GmbH, Jena, Germany)

<sup>b</sup> a, ambiguous; +, positive; -, negative

Table S4: Presence of MGE-encoded genes associates with livestock or human origin in *phi3*-positive isolates<sup>a</sup>

| Gene <sup>b</sup> | Description                       | 143<br>9 | LA<br>86 | LA<br>115 | LA<br>208 | 394<br>9 | LA<br>232 | 462<br>3 | LA<br>272 | LA<br>281 | 523<br>5 | LA<br>290 | LA<br>293 | LA<br>301 | 54<br>18 | LA<br>305 | LA<br>309 | LA<br>343 | LA<br>388 | LA<br>415 | LA<br>436 | LA<br>562 |
|-------------------|-----------------------------------|----------|----------|-----------|-----------|----------|-----------|----------|-----------|-----------|----------|-----------|-----------|-----------|----------|-----------|-----------|-----------|-----------|-----------|-----------|-----------|
| <i>int phi2</i>   | integrase gene of bacteriophage 2 | +        | -        | -         | -         | +        | -         | -        | -         | -         | -        | -         | +         | -         | -        | -         | -         | -         | -         | -         | -         | -         |
| <i>int phi6</i>   | integrase gene of bacteriophage 6 | -        | +        | +         | -         | +        | +         | -        | -         | -         | +        | +         | -         | +         | +        | -         | -         | +         | +         | +         | +         | +         |
| <i>int phi7</i>   | integrase gene of bacteriophage 7 | -        | -        | -         | -         | -        | -         | -        | -         | -         | -        | -         | -         | -         | -        | -         | -         | -         | -         | -         | -         | -         |
| <i>cadDX</i>      | operon of gene <i>cadX</i>        | +        | -        | -         | -         | +        | -         | -        | -         | -         | -        | -         | -         | -         | -        | -         | -         | -         | -         | -         | -         | -         |
| <i>rep27</i>      | replication protein 27            | -        | -        | -         | -         | -        | -         | -        | -         | -         | -        | -         | -         | -         | -        | -         | -         | -         | -         | -         | -         | -         |
| <i>rep7</i>       | replication protein 7             | +        | +        | +         | +         | +        | +         | +        | +         | +         | +        | +         | +         | +         | +        | +         | +         | -         | +         | +         | +         | +         |

<sup>a</sup> MGE-located genes associated with C398 isolates of animal origin are highlighted in grey (1); MGE, mobile genetic element;

<sup>b</sup> Detection of genes by *in silico* PCR using oligonucleotides for *int phi2* (2) and *int phi6*, *int phi7*, *cadDX*, *rep27*, *rep7* (3).

## References

1. McCarthy AJ, van Wamel W, Vandendriessche S, Larsen J, Denis O, Garcia-Graells C, Uhlemann AC, Lowy FD, Skov R, Lindsay JA. 2012. *Staphylococcus aureus* CC398 clade associated with human-to-human transmission. *Appl Environ Microbiol* 78: 8845-8848. <https://doi.org/10.1128/AEM.02398-12>
2. Schijffelen MJ, Boel CHE, van Strijp JAG, Fluit AC. 2010. Whole genome analysis of a livestock-associated methicillin-resistant *Staphylococcus aureus* ST398 isolate from a case of human endocarditis. *BMC Genomics* 11:376. <https://doi.org/10.1186/1471-2164-11-376>
3. Lekkerkerk WSN, van Wamel WJB, Snijders S V, Willems RJ, van Duijkeren E, Broens EM, Wagenaar JA, Lindsay JA, Vos MC. 2015. What is the origin of livestock-associated Methicillin-resistant *Staphylococcus aureus* Clonal Complex 398 isolates from humans without livestock contact? An epidemiological and genetic analysis. *J Clin Microbiol* 53:1836–1841. <https://doi.org/10.1128/JCM.02702-14>
